# Supplementary material for: AI-enabled, implantable, multichannel wireless telemetry for photodynamic therapy
Source: PubMed Central journal article supplement (PMC9023557; doi:10.1038/s41467-022-29878-1), 2022-04-21
Supplement: 41467_2022_29878_MOESM4_ESM.pdf [file 41467_2022_29878_MOESM4_ESM.pdf]

**Title:** Supplementary Movie 1.

**Description:** Demonstration of multi-cage activation using a single power source.

**Title:** Supplementary Movie 2.

**Description:** In vivo demonstration of activation of 5-mice in a cage.
